# Supplementary material
Source: MDPI journal article supplement (https://www.mdpi.com/2073-4441/14/10/1594)
Supplement: s1 [file s1]

## Article

# Genotoxicity Set Up in *Artemia franciscana* Nauplii and Adults Exposed to Phenanthrene, Naphthalene, Fluoranthene, and Benzo(k)fluoranthene

Luisa Albarano <sup>1,2,\*</sup>, Sara Serafini <sup>1</sup>, Maria Toscanesi <sup>3</sup>, Marco Trifuoggi <sup>3</sup>, Valerio Zupo <sup>4</sup>, Maria Costantini <sup>2</sup>, Davide A. L. Vignati <sup>5</sup>, Marco Guida <sup>1</sup> and Giovanni Libralato <sup>1,2</sup>

## Supplementary materials

**Table S1.** Seawater solubility of naphthalene, phenanthrene, fluoranthene and benzo-k-fluoranthene at 25 °C and 35 g salts/kg.

| Compounds            | Solubility  | References |
|----------------------|-------------|------------|
| Naphthalene          | 2.2 g/ 100g | [1]        |
| Phenanthrene         | 7.1 g/ 100g | [1]        |
| Fluoranthene         | 2.6 g/ 100g | [2]        |
| Benzo-k-fluoranthene | < 1 g/ L    | [3]        |

**Table S2.** Tukey's test used to indicate the significance level between PAHs different concentrations and control (0 mg/L) on nauplii after 24 h and 48 h of exposure: \* < 0.05, \*\* p < 0.01, \*\*\* p < 0.001, \*\*\*\* p < 0.0001. n.s. = not significant.

|     | 24h             | p-value | 48h             | p-value |
|-----|-----------------|---------|-----------------|---------|
| NAP | 0 vs. 0.015     | >0.9999 | 0 vs. 0.015     | >0.9999 |
|     | 0 vs. 0.032     | >0.9999 | 0 vs. 0.032     | 0.6632  |
|     | 0 vs. 0.078     | >0.9999 | 0 vs. 0.078     | 0.6632  |
|     | 0 vs. 0.11      | >0.9999 | 0 vs. 0.11      | 0.0048  |
|     | 0 vs. 0.26      | >0.9999 | 0 vs. 0.26      | 0.0048  |
|     | 0 vs. 0.41      | >0.9999 | 0 vs. 0.41      | <0.0001 |
|     | 0 vs. 0.76      | >0.9999 | 0 vs. 0.76      | <0.0001 |
|     | 0 vs. 1.45      | 0.6632  | 0 vs. 1.45      | <0.0001 |
|     | 0 vs. 4.23      | <0.0001 | 0 vs. 4.23      | <0.0001 |
|     | 0 vs. 10.1      | <0.0001 | 0 vs. 10.1      | <0.0001 |
|     | 0.015 vs. 0.032 | >0.9999 | 0.015 vs. 0.032 | >0.9999 |
|     | 0.015 vs. 0.078 | >0.9999 | 0.015 vs. 0.078 | >0.9999 |
|     | 0.015 vs. 0.11  | >0.9999 | 0.015 vs. 0.11  | 0.6632  |
|     | 0.015 vs. 0.26  | >0.9999 | 0.015 vs. 0.26  | 0.6632  |
|     | 0.015 vs. 0.41  | >0.9999 | 0.015 vs. 0.41  | <0.0001 |
|     | 0.015 vs. 0.76  | >0.9999 | 0.015 vs. 0.76  | <0.0001 |
|     | 0.015 vs. 1.45  | 0.6632  | 0.015 vs. 1.45  | <0.0001 |
|     | 0.015 vs. 4.23  | <0.0001 | 0.015 vs. 4.23  | <0.0001 |
|     | 0.015 vs. 10.1  | <0.0001 | 0.015 vs. 10.1  | <0.0001 |
|     | 0.032 vs. 0.078 | >0.9999 | 0.032 vs. 0.078 | >0.9999 |
|     | 0.032 vs. 0.11  | >0.9999 | 0.032 vs. 0.11  | >0.9999 |
|     | 0.032 vs. 0.26  | >0.9999 | 0.032 vs. 0.26  | >0.9999 |
|     | 0.032 vs. 0.41  | >0.9999 | 0.032 vs. 0.41  | <0.0001 |
|     | 0.032 vs. 0.76  | >0.9999 | 0.032 vs. 0.76  | <0.0001 |
|     | 0.032 vs. 1.45  | 0.6632  | 0.032 vs. 1.45  | <0.0001 |

|     |                |         |                |         |
|-----|----------------|---------|----------------|---------|
| PHE | 0.032 vs. 4.23 | <0.0001 | 0.032 vs. 4.23 | <0.0001 |
|     | 0.032 vs. 10.1 | <0.0001 | 0.032 vs. 10.1 | <0.0001 |
|     | 0.078 vs. 0.11 | >0.9999 | 0.078 vs. 0.11 | >0.9999 |
|     | 0.078 vs. 0.26 | >0.9999 | 0.078 vs. 0.26 | >0.9999 |
|     | 0.078 vs. 0.41 | >0.9999 | 0.078 vs. 0.41 | <0.0001 |
|     | 0.078 vs. 0.76 | >0.9999 | 0.078 vs. 0.76 | <0.0001 |
|     | 0.078 vs. 1.45 | 0.9935  | 0.078 vs. 1.45 | <0.0001 |
|     | 0.078 vs. 4.23 | <0.0001 | 0.078 vs. 4.23 | <0.0001 |
|     | 0.078 vs. 10.1 | <0.0001 | 0.078 vs. 10.1 | <0.0001 |
|     | 0.11 vs. 0.26  | >0.9999 | 0.11 vs. 0.26  | >0.9999 |
|     | 0.11 vs. 0.41  | >0.9999 | 0.11 vs. 0.41  | 0.0048  |
|     | 0.11 vs. 0.76  | >0.9999 | 0.11 vs. 0.76  | 0.0007  |
|     | 0.11 vs. 1.45  | >0.9999 | 0.11 vs. 1.45  | <0.0001 |
|     | 0.11 vs. 4.23  | 0.0048  | 0.11 vs. 4.23  | <0.0001 |
|     | 0.11 vs. 10.1  | <0.0001 | 0.11 vs. 10.1  | <0.0001 |
|     | 0.26 vs. 0.41  | >0.9999 | 0.26 vs. 0.41  | 0.0048  |
|     | 0.26 vs. 0.76  | >0.9999 | 0.26 vs. 0.76  | 0.0007  |
|     | 0.26 vs. 1.45  | >0.9999 | 0.26 vs. 1.45  | <0.0001 |
|     | 0.26 vs. 4.23  | 0.0048  | 0.26 vs. 4.23  | <0.0001 |
|     | 0.26 vs. 10.1  | <0.0001 | 0.26 vs. 10.1  | <0.0001 |
|     | 0.41 vs. 0.76  | >0.9999 | 0.41 vs. 0.76  | >0.9999 |
|     | 0.41 vs. 1.45  | >0.9999 | 0.41 vs. 1.45  | >0.9999 |
|     | 0.41 vs. 4.23  | 0.0048  | 0.41 vs. 4.23  | 0.0048  |
|     | 0.41 vs. 10.1  | <0.0001 | 0.41 vs. 10.1  | 0.0048  |
|     | 0.76 vs. 1.45  | >0.9999 | 0.76 vs. 1.45  | >0.9999 |
|     | 0.76 vs. 4.23  | 0.0048  | 0.76 vs. 4.23  | 0.032   |
|     | 0.76 vs. 10.1  | <0.0001 | 0.76 vs. 10.1  | 0.032   |
|     | 1.45 vs. 4.23  | 0.1816  | 1.45 vs. 4.23  | 0.6632  |
|     | 1.45 vs. 10.1  | 0.0048  | 1.45 vs. 10.1  | 0.6632  |
|     | 4.23 vs. 10.1  | >0.9999 | 4.23 vs. 10.1  | >0.9999 |
|     | 0 vs. 0.21     | >0.9999 | 0 vs. 0.21     | >0.9999 |
|     | 0 vs. 0.71     | 0.4495  | 0 vs. 0.71     | 0.1212  |
|     | 0 vs. 1.15     | 0.0209  | 0 vs. 1.15     | 0.0027  |
|     | 0 vs. 2.26     | 0.0209  | 0 vs. 2.26     | <0.0001 |
|     | 0 vs. 3.45     | 0.0003  | 0 vs. 3.45     | <0.0001 |
|     | 0 vs. 4.23     | 0.0003  | 0 vs. 4.23     | <0.0001 |
|     | 0 vs. 7.48     | 0.0003  | 0 vs. 7.48     | <0.0001 |
|     | 0 vs. 48.7     | <0.0001 | 0 vs. 48.7     | <0.0001 |
|     | 0 vs. 98.6     | <0.0001 | 0 vs. 98.6     | <0.0001 |
|     | 0 vs. 223.4    | <0.0001 | 0 vs. 223.4    | <0.0001 |
|     | 0.21 vs. 0.71  | 0.4495  | 0.21 vs. 0.71  | 0.4495  |
|     | 0.21 vs. 1.15  | 0.0209  | 0.21 vs. 1.15  | 0.0209  |
|     | 0.21 vs. 2.26  | 0.0209  | 0.21 vs. 2.26  | 0.0003  |
|     | 0.21 vs. 3.45  | 0.0003  | 0.21 vs. 3.45  | <0.0001 |
|     | 0.21 vs. 4.23  | 0.0003  | 0.21 vs. 4.23  | <0.0001 |
|     | 0.21 vs. 7.48  | 0.0003  | 0.21 vs. 7.48  | <0.0001 |
|     | 0.21 vs. 48.7  | <0.0001 | 0.21 vs. 48.7  | <0.0001 |
|     | 0.21 vs. 98.6  | <0.0001 | 0.21 vs. 98.6  | <0.0001 |
|     | 0.21 vs. 223.4 | <0.0001 | 0.21 vs. 223.4 | <0.0001 |
|     | 0.71 vs. 1.15  | 0.9982  | 0.71 vs. 1.15  | 0.9982  |
|     | 0.71 vs. 2.26  | 0.9982  | 0.71 vs. 2.26  | 0.4495  |

|     |                |         |                |         |
|-----|----------------|---------|----------------|---------|
|     | 0.71 vs. 3.45  | 0.4495  | 0.71 vs. 3.45  | 0.1212  |
|     | 0.71 vs. 4.23  | 0.4495  | 0.71 vs. 4.23  | <0.0001 |
|     | 0.71 vs. 7.48  | 0.4495  | 0.71 vs. 7.48  | <0.0001 |
|     | 0.71 vs. 48.7  | <0.0001 | 0.71 vs. 48.7  | <0.0001 |
|     | 0.71 vs. 98.6  | <0.0001 | 0.71 vs. 98.6  | <0.0001 |
|     | 0.71 vs. 223.4 | <0.0001 | 0.71 vs. 223.4 | <0.0001 |
|     | 1.15 vs. 2.26  | >0.9999 | 1.15 vs. 2.26  | 0.9982  |
|     | 1.15 vs. 3.45  | 0.9982  | 1.15 vs. 3.45  | 0.8806  |
|     | 1.15 vs. 4.23  | 0.9982  | 1.15 vs. 4.23  | 0.0003  |
|     | 1.15 vs. 7.48  | 0.9982  | 1.15 vs. 7.48  | <0.0001 |
|     | 1.15 vs. 48.7  | 0.0027  | 1.15 vs. 48.7  | <0.0001 |
|     | 1.15 vs. 98.6  | <0.0001 | 1.15 vs. 98.6  | <0.0001 |
|     | 1.15 vs. 223.4 | <0.0001 | 1.15 vs. 223.4 | <0.0001 |
|     | 2.26 vs. 3.45  | 0.9982  | 2.26 vs. 3.45  | >0.9999 |
|     | 2.26 vs. 4.23  | 0.9982  | 2.26 vs. 4.23  | 0.0209  |
|     | 2.26 vs. 7.48  | 0.9982  | 2.26 vs. 7.48  | 0.0003  |
|     | 2.26 vs. 48.7  | 0.0027  | 2.26 vs. 48.7  | <0.0001 |
|     | 2.26 vs. 98.6  | <0.0001 | 2.26 vs. 98.6  | <0.0001 |
|     | 2.26 vs. 223.4 | <0.0001 | 2.26 vs. 223.4 | <0.0001 |
|     | 3.45 vs. 4.23  | >0.9999 | 3.45 vs. 4.23  | 0.1212  |
|     | 3.45 vs. 7.48  | >0.9999 | 3.45 vs. 7.48  | 0.0027  |
|     | 3.45 vs. 48.7  | 0.1212  | 3.45 vs. 48.7  | <0.0001 |
|     | 3.45 vs. 98.6  | 0.0027  | 3.45 vs. 98.6  | <0.0001 |
|     | 3.45 vs. 223.4 | 0.0027  | 3.45 vs. 223.4 | <0.0001 |
|     | 4.23 vs. 7.48  | >0.9999 | 4.23 vs. 7.48  | 0.9982  |
|     | 4.23 vs. 48.7  | 0.1212  | 4.23 vs. 48.7  | 0.4495  |
|     | 4.23 vs. 98.6  | 0.0027  | 4.23 vs. 98.6  | 0.0209  |
|     | 4.23 vs. 223.4 | 0.0027  | 4.23 vs. 223.4 | <0.0001 |
|     | 7.48 vs. 48.7  | 0.1212  | 7.48 vs. 48.7  | 0.9982  |
|     | 7.48 vs. 98.6  | 0.0027  | 7.48 vs. 98.6  | 0.4495  |
|     | 7.48 vs. 223.4 | 0.0027  | 7.48 vs. 223.4 | 0.0003  |
|     | 48.7 vs. 98.6  | 0.9982  | 48.7 vs. 98.6  | 0.9982  |
|     | 48.7 vs. 223.4 | 0.9982  | 48.7 vs. 223.4 | 0.0209  |
|     | 98.6 vs. 223.4 | >0.9999 | 98.6 vs. 223.4 | 0.4495  |
| FLT | 0 vs. 0.29     | >0.9999 | 0 vs. 0.29     | 0.0006  |
|     | 0 vs. 0.81     | >0.9999 | 0 vs. 0.81     | <0.0001 |
|     | 0 vs. 2.14     | >0.9999 | 0 vs. 2.14     | <0.0001 |
|     | 0 vs. 4.41     | >0.9999 | 0 vs. 4.41     | <0.0001 |
|     | 0 vs. 9.91     | 0.0093  | 0 vs. 9.91     | <0.0001 |
|     | 0 vs. 20.4     | 0.0093  | 0 vs. 20.4     | <0.0001 |
|     | 0 vs. 45.6     | 0.0093  | 0 vs. 45.6     | <0.0001 |
|     | 0 vs. 91.6     | 0.0093  | 0 vs. 91.6     | <0.0001 |
|     | 0 vs. 179      | <0.0001 | 0 vs. 179      | <0.0001 |
|     | 0 vs. 325      | <0.0001 | 0 vs. 325      | <0.0001 |
|     | 0.29 vs. 0.81  | >0.9999 | 0.29 vs. 0.81  | 0.0006  |
|     | 0.29 vs. 2.14  | >0.9999 | 0.29 vs. 2.14  | <0.0001 |
|     | 0.29 vs. 4.41  | >0.9999 | 0.29 vs. 4.41  | <0.0001 |
|     | 0.29 vs. 9.91  | 0.0093  | 0.29 vs. 9.91  | <0.0001 |
|     | 0.29 vs. 20.4  | 0.0093  | 0.29 vs. 20.4  | <0.0001 |
|     | 0.29 vs. 45.6  | 0.0093  | 0.29 vs. 45.6  | <0.0001 |
|     | 0.29 vs. 91.6  | 0.0093  | 0.29 vs. 91.6  | <0.0001 |

|     |                |         |                |         |
|-----|----------------|---------|----------------|---------|
|     | 0.29 vs. 179   | <0.0001 | 0.29 vs. 179   | <0.0001 |
|     | 0.29 vs. 325   | <0.0001 | 0.29 vs. 325   | <0.0001 |
|     | 0.81 vs. 2.14  | >0.9999 | 0.81 vs. 2.14  | <0.0001 |
|     | 0.81 vs. 4.41  | >0.9999 | 0.81 vs. 4.41  | <0.0001 |
|     | 0.81 vs. 9.91  | 0.0093  | 0.81 vs. 9.91  | <0.0001 |
|     | 0.81 vs. 20.4  | 0.0093  | 0.81 vs. 20.4  | <0.0001 |
|     | 0.81 vs. 45.6  | 0.0093  | 0.81 vs. 45.6  | <0.0001 |
|     | 0.81 vs. 91.6  | 0.0093  | 0.81 vs. 91.6  | <0.0001 |
|     | 0.81 vs. 179   | <0.0001 | 0.81 vs. 179   | <0.0001 |
|     | 0.81 vs. 325   | <0.0001 | 0.81 vs. 325   | <0.0001 |
|     | 2.14 vs. 4.41  | >0.9999 | 2.14 vs. 4.41  | >0.9999 |
|     | 2.14 vs. 9.91  | 0.0093  | 2.14 vs. 9.91  | 0.522   |
|     | 2.14 vs. 20.4  | 0.0093  | 2.14 vs. 20.4  | 0.0989  |
|     | 2.14 vs. 45.6  | 0.0093  | 2.14 vs. 45.6  | 0.0006  |
|     | 2.14 vs. 91.6  | 0.0093  | 2.14 vs. 91.6  | 0.0006  |
|     | 2.14 vs. 179   | <0.0001 | 2.14 vs. 179   | 0.0006  |
|     | 2.14 vs. 325   | <0.0001 | 2.14 vs. 325   | 0.0006  |
|     | 4.41 vs. 9.91  | 0.0989  | 4.41 vs. 9.91  | 0.522   |
|     | 4.41 vs. 20.4  | 0.0989  | 4.41 vs. 20.4  | 0.0989  |
|     | 4.41 vs. 45.6  | 0.0989  | 4.41 vs. 45.6  | 0.0006  |
|     | 4.41 vs. 91.6  | 0.0989  | 4.41 vs. 91.6  | 0.0006  |
|     | 4.41 vs. 179   | <0.0001 | 4.41 vs. 179   | 0.0006  |
|     | 4.41 vs. 325   | <0.0001 | 4.41 vs. 325   | 0.0006  |
|     | 9.91 vs. 20.4  | >0.9999 | 9.91 vs. 20.4  | >0.9999 |
|     | 9.91 vs. 45.6  | >0.9999 | 9.91 vs. 45.6  | 0.522   |
|     | 9.91 vs. 91.6  | >0.9999 | 9.91 vs. 91.6  | 0.522   |
|     | 9.91 vs. 179   | 0.0093  | 9.91 vs. 179   | 0.522   |
|     | 9.91 vs. 325   | <0.0001 | 9.91 vs. 325   | 0.522   |
|     | 20.4 vs. 45.6  | >0.9999 | 20.4 vs. 45.6  | 0.969   |
|     | 20.4 vs. 91.6  | >0.9999 | 20.4 vs. 91.6  | 0.969   |
|     | 20.4 vs. 179   | 0.0093  | 20.4 vs. 179   | 0.969   |
|     | 20.4 vs. 325   | <0.0001 | 20.4 vs. 325   | 0.969   |
|     | 45.6 vs. 91.6  | >0.9999 | 45.6 vs. 91.6  | >0.9999 |
|     | 45.6 vs. 179   | 0.0093  | 45.6 vs. 179   | >0.9999 |
|     | 45.6 vs. 325   | <0.0001 | 45.6 vs. 325   | >0.9999 |
|     | 91.6 vs. 179   | 0.0093  | 91.6 vs. 179   | >0.9999 |
|     | 91.6 vs. 325   | <0.0001 | 91.6 vs. 325   | >0.9999 |
|     | 179 vs. 325    | <0.0001 | 179 vs. 325    | >0.9999 |
| BkF | 0 vs. 0.016    | >0.9999 | 0 vs. 0.016    | 0.8478  |
|     | 0 vs. 0.41     | >0.9999 | 0 vs. 0.41     | 0.0604  |
|     | 0 vs. 0.78     | >0.9999 | 0 vs. 0.78     | 0.0604  |
|     | 0 vs. 0.98     | >0.9999 | 0 vs. 0.98     | 0.0604  |
|     | 0 vs. 2.4      | >0.9999 | 0 vs. 2.4      | 0.0005  |
|     | 0 vs. 5.3      | >0.9999 | 0 vs. 5.3      | 0.0005  |
|     | 0 vs. 10.4     | >0.9999 | 0 vs. 10.4     | 0.0005  |
|     | 0 vs. 19.5     | >0.9999 | 0 vs. 19.5     | 0.0005  |
|     | 0 vs. 41.7     | >0.9999 | 0 vs. 41.7     | 0.0005  |
|     | 0 vs. 84.6     | >0.9999 | 0 vs. 84.6     | 0.0005  |
|     | 0.016 vs. 0.41 | >0.9999 | 0.016 vs. 0.41 | 0.8478  |
|     | 0.016 vs. 0.78 | >0.9999 | 0.016 vs. 0.78 | 0.8478  |
|     | 0.016 vs. 0.98 | >0.9999 | 0.016 vs. 0.98 | 0.8478  |

|                |         |                |         |
|----------------|---------|----------------|---------|
| 0.016 vs. 2.4  | >0.9999 | 0.016 vs. 2.4  | 0.0604  |
| 0.016 vs. 5.3  | >0.9999 | 0.016 vs. 5.3  | 0.0604  |
| 0.016 vs. 10.4 | >0.9999 | 0.016 vs. 10.4 | 0.0604  |
| 0.016 vs. 19.5 | >0.9999 | 0.016 vs. 19.5 | 0.0604  |
| 0.016 vs. 41.7 | >0.9999 | 0.016 vs. 41.7 | 0.0604  |
| 0.016 vs. 84.6 | >0.9999 | 0.016 vs. 84.6 | 0.0604  |
| 0.41 vs. 0.78  | >0.9999 | 0.41 vs. 0.78  | >0.9999 |
| 0.41 vs. 0.98  | >0.9999 | 0.41 vs. 0.98  | >0.9999 |
| 0.41 vs. 2.4   | >0.9999 | 0.41 vs. 2.4   | 0.8478  |
| 0.41 vs. 5.3   | >0.9999 | 0.41 vs. 5.3   | 0.8478  |
| 0.41 vs. 10.4  | >0.9999 | 0.41 vs. 10.4  | 0.8478  |
| 0.41 vs. 19.5  | >0.9999 | 0.41 vs. 19.5  | 0.8478  |
| 0.41 vs. 41.7  | >0.9999 | 0.41 vs. 41.7  | 0.8478  |
| 0.41 vs. 84.6  | >0.9999 | 0.41 vs. 84.6  | 0.8478  |
| 0.78 vs. 0.98  | >0.9999 | 0.78 vs. 0.98  | >0.9999 |
| 0.78 vs. 2.4   | >0.9999 | 0.78 vs. 2.4   | 0.8478  |
| 0.78 vs. 5.3   | >0.9999 | 0.78 vs. 5.3   | 0.8478  |
| 0.78 vs. 10.4  | >0.9999 | 0.78 vs. 10.4  | 0.8478  |
| 0.78 vs. 19.5  | >0.9999 | 0.78 vs. 19.5  | 0.8478  |
| 0.78 vs. 41.7  | >0.9999 | 0.78 vs. 41.7  | 0.8478  |
| 0.78 vs. 84.6  | >0.9999 | 0.78 vs. 84.6  | 0.8478  |
| 0.98 vs. 2.4   | >0.9999 | 0.98 vs. 2.4   | 0.8478  |
| 0.98 vs. 5.3   | >0.9999 | 0.98 vs. 5.3   | 0.8478  |
| 0.98 vs. 10.4  | >0.9999 | 0.98 vs. 10.4  | 0.8478  |
| 0.98 vs. 19.5  | >0.9999 | 0.98 vs. 19.5  | 0.8478  |
| 0.98 vs. 41.7  | >0.9999 | 0.98 vs. 41.7  | 0.8478  |
| 0.98 vs. 84.6  | >0.9999 | 0.98 vs. 84.6  | 0.8478  |
| 2.4 vs. 5.3    | >0.9999 | 2.4 vs. 5.3    | >0.9999 |
| 2.4 vs. 10.4   | >0.9999 | 2.4 vs. 10.4   | >0.9999 |
| 2.4 vs. 19.5   | >0.9999 | 2.4 vs. 19.5   | >0.9999 |
| 2.4 vs. 41.7   | >0.9999 | 2.4 vs. 41.7   | >0.9999 |
| 2.4 vs. 84.6   | >0.9999 | 2.4 vs. 84.6   | >0.9999 |
| 5.3 vs. 10.4   | >0.9999 | 5.3 vs. 10.4   | >0.9999 |
| 5.3 vs. 19.5   | >0.9999 | 5.3 vs. 19.5   | >0.9999 |
| 5.3 vs. 41.7   | >0.9999 | 5.3 vs. 41.7   | >0.9999 |
| 5.3 vs. 84.6   | >0.9999 | 5.3 vs. 84.6   | >0.9999 |
| 10.4 vs. 19.5  | >0.9999 | 10.4 vs. 19.5  | >0.9999 |
| 10.4 vs. 41.7  | >0.9999 | 10.4 vs. 41.7  | >0.9999 |
| 10.4 vs. 84.6  | >0.9999 | 10.4 vs. 84.6  | >0.9999 |
| 19.5 vs. 41.7  | >0.9999 | 19.5 vs. 41.7  | >0.9999 |
| 19.5 vs. 84.6  | >0.9999 | 19.5 vs. 84.6  | >0.9999 |
| 41.7 vs. 84.6  | >0.9999 | 41.7 vs. 84.6  | >0.9999 |

**Table S3.** Tukey's test used to indicate the significance level between PAHs different concentrations and control (0 mg/L) on adults after 24 h and 48 h of exposure: \* < 0.05, \*\* p < 0.01, \*\*\* p < 0.001, \*\*\*\* p < 0.0001. n.s. = not significant.

|     | 24h             | <i>p-value</i> | 48h             | <i>p-value</i> |
|-----|-----------------|----------------|-----------------|----------------|
| NAP | 0 vs. 0.015     | >0.9999        | 0 vs. 0.015     | >0.9999        |
|     | 0 vs. 0.032     | >0.9999        | 0 vs. 0.032     | >0.9999        |
|     | 0 vs. 0.078     | >0.9999        | 0 vs. 0.078     | >0.9999        |
|     | 0 vs. 0.11      | >0.9999        | 0 vs. 0.11      | >0.9999        |
|     | 0 vs. 0.26      | >0.9999        | 0 vs. 0.26      | >0.9999        |
|     | 0 vs. 0.41      | >0.9999        | 0 vs. 0.41      | 0.9171         |
|     | 0 vs. 0.76      | >0.9999        | 0 vs. 0.76      | 0.9171         |
|     | 0 vs. 1.45      | >0.9999        | 0 vs. 1.45      | 0.0025         |
|     | 0 vs. 4.23      | 0.9171         | 0 vs. 4.23      | <0.0001        |
|     | 0 vs. 10.1      | 0.9171         | 0 vs. 10.1      | <0.0001        |
|     | 0.015 vs. 0.032 | >0.9999        | 0.015 vs. 0.032 | >0.9999        |
|     | 0.015 vs. 0.078 | >0.9999        | 0.015 vs. 0.078 | >0.9999        |
|     | 0.015 vs. 0.11  | >0.9999        | 0.015 vs. 0.11  | >0.9999        |
|     | 0.015 vs. 0.26  | >0.9999        | 0.015 vs. 0.26  | >0.9999        |
|     | 0.015 vs. 0.41  | >0.9999        | 0.015 vs. 0.41  | 0.9171         |
|     | 0.015 vs. 0.76  | >0.9999        | 0.015 vs. 0.76  | 0.9171         |
|     | 0.015 vs. 1.45  | >0.9999        | 0.015 vs. 1.45  | 0.0025         |
|     | 0.015 vs. 4.23  | 0.9171         | 0.015 vs. 4.23  | <0.0001        |
|     | 0.015 vs. 10.1  | 0.9171         | 0.015 vs. 10.1  | <0.0001        |
|     | 0.032 vs. 0.078 | >0.9999        | 0.032 vs. 0.078 | >0.9999        |
|     | 0.032 vs. 0.11  | >0.9999        | 0.032 vs. 0.11  | >0.9999        |
|     | 0.032 vs. 0.26  | >0.9999        | 0.032 vs. 0.26  | >0.9999        |
|     | 0.032 vs. 0.41  | >0.9999        | 0.032 vs. 0.41  | 0.9171         |
|     | 0.032 vs. 0.76  | >0.9999        | 0.032 vs. 0.76  | 0.9171         |
|     | 0.032 vs. 1.45  | >0.9999        | 0.032 vs. 1.45  | 0.0025         |
|     | 0.032 vs. 4.23  | 0.9171         | 0.032 vs. 4.23  | <0.0001        |
|     | 0.032 vs. 10.1  | 0.9171         | 0.032 vs. 10.1  | <0.0001        |
|     | 0.078 vs. 0.11  | >0.9999        | 0.078 vs. 0.11  | >0.9999        |
|     | 0.078 vs. 0.26  | >0.9999        | 0.078 vs. 0.26  | >0.9999        |
|     | 0.078 vs. 0.41  | >0.9999        | 0.078 vs. 0.41  | 0.9171         |
|     | 0.078 vs. 0.76  | >0.9999        | 0.078 vs. 0.76  | 0.9171         |
|     | 0.078 vs. 1.45  | >0.9999        | 0.078 vs. 1.45  | 0.0025         |
|     | 0.078 vs. 4.23  | 0.9171         | 0.078 vs. 4.23  | <0.0001        |
|     | 0.078 vs. 10.1  | 0.9171         | 0.078 vs. 10.1  | <0.0001        |
|     | 0.11 vs. 0.26   | >0.9999        | 0.11 vs. 0.26   | >0.9999        |
|     | 0.11 vs. 0.41   | >0.9999        | 0.11 vs. 0.41   | 0.9171         |
|     | 0.11 vs. 0.76   | >0.9999        | 0.11 vs. 0.76   | 0.9171         |
|     | 0.11 vs. 1.45   | >0.9999        | 0.11 vs. 1.45   | 0.0025         |
|     | 0.11 vs. 4.23   | 0.9171         | 0.11 vs. 4.23   | <0.0001        |
|     | 0.11 vs. 10.1   | 0.9171         | 0.11 vs. 10.1   | <0.0001        |
|     | 0.26 vs. 0.41   | >0.9999        | 0.26 vs. 0.41   | 0.9171         |
|     | 0.26 vs. 0.76   | >0.9999        | 0.26 vs. 0.76   | 0.9171         |
|     | 0.26 vs. 1.45   | >0.9999        | 0.26 vs. 1.45   | 0.0025         |
|     | 0.26 vs. 4.23   | 0.9171         | 0.26 vs. 4.23   | <0.0001        |
|     | 0.26 vs. 10.1   | 0.9171         | 0.26 vs. 10.1   | <0.0001        |
|     | 0.41 vs. 0.76   | >0.9999        | 0.41 vs. 0.76   | >0.9999        |
|     | 0.41 vs. 1.45   | >0.9999        | 0.41 vs. 1.45   | 0.1347         |

|     |                |         |                |         |
|-----|----------------|---------|----------------|---------|
| PHE | 0.41 vs. 4.23  | 0.9171  | 0.41 vs. 4.23  | <0.0001 |
|     | 0.41 vs. 10.1  | 0.9171  | 0.41 vs. 10.1  | <0.0001 |
|     | 0.76 vs. 1.45  | >0.9999 | 0.76 vs. 1.45  | 0.1347  |
|     | 0.76 vs. 4.23  | 0.9171  | 0.76 vs. 4.23  | <0.0001 |
|     | 0.76 vs. 10.1  | 0.9171  | 0.76 vs. 10.1  | <0.0001 |
|     | 1.45 vs. 4.23  | 0.9171  | 1.45 vs. 4.23  | 0.1399  |
|     | 1.45 vs. 10.1  | 0.9171  | 1.45 vs. 10.1  | 0.0027  |
|     | 4.23 vs. 10.1  | >0.9999 | 4.23 vs. 10.1  | 0.9199  |
|     | 0 vs. 0.21     | >0.9999 | 0 vs. 0.21     | >0.9999 |
|     | 0 vs. 0.71     | >0.9999 | 0 vs. 0.71     | <0.0001 |
|     | 0 vs. 1.15     | >0.9999 | 0 vs. 1.15     | <0.0001 |
|     | 0 vs. 2.26     | >0.9999 | 0 vs. 2.26     | <0.0001 |
|     | 0 vs. 3.45     | >0.9999 | 0 vs. 3.45     | <0.0001 |
|     | 0 vs. 4.23     | >0.9999 | 0 vs. 4.23     | <0.0001 |
|     | 0 vs. 7.48     | >0.9999 | 0 vs. 7.48     | <0.0001 |
|     | 0 vs. 48.7     | >0.9999 | 0 vs. 48.7     | <0.0001 |
|     | 0 vs. 98.6     | >0.9999 | 0 vs. 98.6     | <0.0001 |
|     | 0 vs. 223.4    | >0.9999 | 0 vs. 223.4    | <0.0001 |
|     | 0.21 vs. 0.71  | >0.9999 | 0.21 vs. 0.71  | <0.0001 |
|     | 0.21 vs. 1.15  | >0.9999 | 0.21 vs. 1.15  | <0.0001 |
|     | 0.21 vs. 2.26  | >0.9999 | 0.21 vs. 2.26  | <0.0001 |
|     | 0.21 vs. 3.45  | >0.9999 | 0.21 vs. 3.45  | <0.0001 |
|     | 0.21 vs. 4.23  | >0.9999 | 0.21 vs. 4.23  | <0.0001 |
|     | 0.21 vs. 7.48  | >0.9999 | 0.21 vs. 7.48  | <0.0001 |
|     | 0.21 vs. 48.7  | >0.9999 | 0.21 vs. 48.7  | <0.0001 |
|     | 0.21 vs. 98.6  | >0.9999 | 0.21 vs. 98.6  | <0.0001 |
|     | 0.21 vs. 223.4 | >0.9999 | 0.21 vs. 223.4 | <0.0001 |
|     | 0.71 vs. 1.15  | >0.9999 | 0.71 vs. 1.15  | 0.9998  |
|     | 0.71 vs. 2.26  | >0.9999 | 0.71 vs. 2.26  | 0.9998  |
|     | 0.71 vs. 3.45  | >0.9999 | 0.71 vs. 3.45  | 0.9998  |
|     | 0.71 vs. 4.23  | >0.9999 | 0.71 vs. 4.23  | 0.9431  |
|     | 0.71 vs. 7.48  | >0.9999 | 0.71 vs. 7.48  | 0.0231  |
|     | 0.71 vs. 48.7  | >0.9999 | 0.71 vs. 48.7  | <0.0001 |
|     | 0.71 vs. 98.6  | >0.9999 | 0.71 vs. 98.6  | <0.0001 |
|     | 0.71 vs. 223.4 | >0.9999 | 0.71 vs. 223.4 | <0.0001 |
|     | 1.15 vs. 2.26  | >0.9999 | 1.15 vs. 2.26  | >0.9999 |
|     | 1.15 vs. 3.45  | >0.9999 | 1.15 vs. 3.45  | >0.9999 |
|     | 1.15 vs. 4.23  | >0.9999 | 1.15 vs. 4.23  | 0.9997  |
|     | 1.15 vs. 7.48  | >0.9999 | 1.15 vs. 7.48  | 0.1266  |
|     | 1.15 vs. 48.7  | >0.9999 | 1.15 vs. 48.7  | 0.0002  |
|     | 1.15 vs. 98.6  | >0.9999 | 1.15 vs. 98.6  | <0.0001 |
|     | 1.15 vs. 223.4 | >0.9999 | 1.15 vs. 223.4 | <0.0001 |
|     | 2.26 vs. 3.45  | >0.9999 | 2.26 vs. 3.45  | >0.9999 |
|     | 2.26 vs. 4.23  | >0.9999 | 2.26 vs. 4.23  | 0.9997  |
|     | 2.26 vs. 7.48  | >0.9999 | 2.26 vs. 7.48  | 0.1266  |
|     | 2.26 vs. 48.7  | >0.9999 | 2.26 vs. 48.7  | 0.0002  |
|     | 2.26 vs. 98.6  | >0.9999 | 2.26 vs. 98.6  | <0.0001 |
|     | 2.26 vs. 223.4 | >0.9999 | 2.26 vs. 223.4 | <0.0001 |
|     | 3.45 vs. 4.23  | >0.9999 | 3.45 vs. 4.23  | 0.9997  |
|     | 3.45 vs. 7.48  | >0.9999 | 3.45 vs. 7.48  | 0.1266  |
|     | 3.45 vs. 48.7  | >0.9999 | 3.45 vs. 48.7  | 0.0002  |

|     |                |         |                |         |
|-----|----------------|---------|----------------|---------|
| FLT | 3.45 vs. 98.6  | >0.9999 | 3.45 vs. 98.6  | <0.0001 |
|     | 3.45 vs. 223.4 | >0.9999 | 3.45 vs. 223.4 | <0.0001 |
|     | 4.23 vs. 7.48  | >0.9999 | 4.23 vs. 7.48  | 0.4558  |
|     | 4.23 vs. 48.7  | >0.9999 | 4.23 vs. 48.7  | 0.0017  |
|     | 4.23 vs. 98.6  | >0.9999 | 4.23 vs. 98.6  | <0.0001 |
|     | 4.23 vs. 223.4 | >0.9999 | 4.23 vs. 223.4 | <0.0001 |
|     | 7.48 vs. 48.7  | >0.9999 | 7.48 vs. 48.7  | 0.4558  |
|     | 7.48 vs. 98.6  | >0.9999 | 7.48 vs. 98.6  | 0.0017  |
|     | 7.48 vs. 223.4 | >0.9999 | 7.48 vs. 223.4 | <0.0001 |
|     | 48.7 vs. 98.6  | >0.9999 | 48.7 vs. 98.6  | 0.4558  |
|     | 48.7 vs. 223.4 | >0.9999 | 48.7 vs. 223.4 | <0.0001 |
|     | 98.6 vs. 223.4 | >0.9999 | 98.6 vs. 223.4 | <0.0001 |
|     | 0 vs. 0.29     | 0.3681  | 0 vs. 0.29     | <0.0001 |
|     | 0 vs. 0.81     | 0.3681  | 0 vs. 0.81     | <0.0001 |
|     | 0 vs. 2.14     | 0.3681  | 0 vs. 2.14     | <0.0001 |
|     | 0 vs. 4.41     | 0.3681  | 0 vs. 4.41     | <0.0001 |
|     | 0 vs. 9.91     | <0.0001 | 0 vs. 9.91     | <0.0001 |
|     | 0 vs. 20.4     | <0.0001 | 0 vs. 20.4     | <0.0001 |
|     | 0 vs. 45.6     | <0.0001 | 0 vs. 45.6     | <0.0001 |
|     | 0 vs. 91.6     | <0.0001 | 0 vs. 91.6     | <0.0001 |
|     | 0 vs. 179      | <0.0001 | 0 vs. 179      | <0.0001 |
|     | 0 vs. 325      | <0.0001 | 0 vs. 325      | <0.0001 |
|     | 0.29 vs. 0.81  | >0.9999 | 0.29 vs. 0.81  | >0.9999 |
|     | 0.29 vs. 2.14  | >0.9999 | 0.29 vs. 2.14  | 0.0006  |
|     | 0.29 vs. 4.41  | >0.9999 | 0.29 vs. 4.41  | <0.0001 |
|     | 0.29 vs. 9.91  | <0.0001 | 0.29 vs. 9.91  | <0.0001 |
|     | 0.29 vs. 20.4  | <0.0001 | 0.29 vs. 20.4  | <0.0001 |
|     | 0.29 vs. 45.6  | <0.0001 | 0.29 vs. 45.6  | <0.0001 |
|     | 0.29 vs. 91.6  | <0.0001 | 0.29 vs. 91.6  | <0.0001 |
|     | 0.29 vs. 179   | <0.0001 | 0.29 vs. 179   | <0.0001 |
|     | 0.29 vs. 325   | <0.0001 | 0.29 vs. 325   | <0.0001 |
|     | 0.81 vs. 2.14  | >0.9999 | 0.81 vs. 2.14  | 0.0006  |
|     | 0.81 vs. 4.41  | >0.9999 | 0.81 vs. 4.41  | <0.0001 |
|     | 0.81 vs. 9.91  | <0.0001 | 0.81 vs. 9.91  | <0.0001 |
|     | 0.81 vs. 20.4  | <0.0001 | 0.81 vs. 20.4  | <0.0001 |
|     | 0.81 vs. 45.6  | <0.0001 | 0.81 vs. 45.6  | <0.0001 |
|     | 0.81 vs. 91.6  | <0.0001 | 0.81 vs. 91.6  | <0.0001 |
|     | 0.81 vs. 179   | <0.0001 | 0.81 vs. 179   | <0.0001 |
|     | 0.81 vs. 325   | <0.0001 | 0.81 vs. 325   | <0.0001 |
|     | 2.14 vs. 4.41  | >0.9999 | 2.14 vs. 4.41  | 0.8354  |
|     | 2.14 vs. 9.91  | <0.0001 | 2.14 vs. 9.91  | 0.096   |
|     | 2.14 vs. 20.4  | <0.0001 | 2.14 vs. 20.4  | 0.0035  |
|     | 2.14 vs. 45.6  | <0.0001 | 2.14 vs. 45.6  | 0.0035  |
|     | 2.14 vs. 91.6  | <0.0001 | 2.14 vs. 91.6  | 0.0035  |
|     | 2.14 vs. 179   | <0.0001 | 2.14 vs. 179   | 0.0035  |
|     | 2.14 vs. 325   | <0.0001 | 2.14 vs. 325   | 0.0035  |
|     | 4.41 vs. 9.91  | <0.0001 | 4.41 vs. 9.91  | >0.9999 |
|     | 4.41 vs. 20.4  | <0.0001 | 4.41 vs. 20.4  | 0.8354  |
|     | 4.41 vs. 45.6  | <0.0001 | 4.41 vs. 45.6  | 0.8354  |
|     | 4.41 vs. 91.6  | <0.0001 | 4.41 vs. 91.6  | 0.8354  |
|     | 4.41 vs. 179   | <0.0001 | 4.41 vs. 179   | 0.8354  |



|     |                |         |                |         |
|-----|----------------|---------|----------------|---------|
| BkF | 4.41 vs. 325   | <0.0001 | 4.41 vs. 325   | 0.8354  |
|     | 9.91 vs. 20.4  | >0.9999 | 9.91 vs. 20.4  | >0.9999 |
|     | 9.91 vs. 45.6  | >0.9999 | 9.91 vs. 45.6  | >0.9999 |
|     | 9.91 vs. 91.6  | 0.3681  | 9.91 vs. 91.6  | >0.9999 |
|     | 9.91 vs. 179   | 0.0441  | 9.91 vs. 179   | >0.9999 |
|     | 9.91 vs. 325   | <0.0001 | 9.91 vs. 325   | >0.9999 |
|     | 20.4 vs. 45.6  | >0.9999 | 20.4 vs. 45.6  | >0.9999 |
|     | 20.4 vs. 91.6  | 0.3681  | 20.4 vs. 91.6  | >0.9999 |
|     | 20.4 vs. 179   | 0.0441  | 20.4 vs. 179   | >0.9999 |
|     | 20.4 vs. 325   | <0.0001 | 20.4 vs. 325   | >0.9999 |
|     | 45.6 vs. 91.6  | 0.3681  | 45.6 vs. 91.6  | >0.9999 |
|     | 45.6 vs. 179   | 0.0441  | 45.6 vs. 179   | >0.9999 |
|     | 45.6 vs. 325   | <0.0001 | 45.6 vs. 325   | >0.9999 |
|     | 91.6 vs. 179   | >0.9999 | 91.6 vs. 179   | >0.9999 |
|     | 91.6 vs. 325   | 0.0083  | 91.6 vs. 325   | >0.9999 |
|     | 179 vs. 325    | 0.096   | 179 vs. 325    | >0.9999 |
|     | 0 vs. 0.016    | >0.9999 | 0 vs. 0.016    | >0.9999 |
|     | 0 vs. 0.41     | >0.9999 | 0 vs. 0.41     | >0.9999 |
|     | 0 vs. 0.78     | >0.9999 | 0 vs. 0.78     | 0.9176  |
|     | 0 vs. 0.98     | >0.9999 | 0 vs. 0.98     | 0.1357  |
|     | 0 vs. 2.4      | >0.9999 | 0 vs. 2.4      | 0.0026  |
|     | 0 vs. 5.3      | >0.9999 | 0 vs. 5.3      | 0.0026  |
|     | 0 vs. 10.4     | >0.9999 | 0 vs. 10.4     | 0.0026  |
|     | 0 vs. 19.5     | >0.9999 | 0 vs. 19.5     | 0.0026  |
|     | 0 vs. 41.7     | 0.1357  | 0 vs. 41.7     | <0.0001 |
|     | 0 vs. 84.6     | 0.1357  | 0 vs. 84.6     | <0.0001 |
|     | 0.016 vs. 0.41 | >0.9999 | 0.016 vs. 0.41 | >0.9999 |
|     | 0.016 vs. 0.78 | >0.9999 | 0.016 vs. 0.78 | 0.9176  |
|     | 0.016 vs. 0.98 | >0.9999 | 0.016 vs. 0.98 | 0.1357  |
|     | 0.016 vs. 2.4  | >0.9999 | 0.016 vs. 2.4  | 0.0026  |
|     | 0.016 vs. 5.3  | >0.9999 | 0.016 vs. 5.3  | 0.0026  |
|     | 0.016 vs. 10.4 | >0.9999 | 0.016 vs. 10.4 | 0.0026  |
|     | 0.016 vs. 19.5 | >0.9999 | 0.016 vs. 19.5 | 0.0026  |
|     | 0.016 vs. 41.7 | 0.1357  | 0.016 vs. 41.7 | <0.0001 |
|     | 0.016 vs. 84.6 | 0.1357  | 0.016 vs. 84.6 | <0.0001 |
|     | 0.41 vs. 0.78  | >0.9999 | 0.41 vs. 0.78  | 0.9176  |
|     | 0.41 vs. 0.98  | >0.9999 | 0.41 vs. 0.98  | 0.1357  |
|     | 0.41 vs. 2.4   | >0.9999 | 0.41 vs. 2.4   | 0.0026  |
|     | 0.41 vs. 5.3   | >0.9999 | 0.41 vs. 5.3   | 0.0026  |
|     | 0.41 vs. 10.4  | >0.9999 | 0.41 vs. 10.4  | 0.0026  |
|     | 0.41 vs. 19.5  | >0.9999 | 0.41 vs. 19.5  | 0.0026  |
|     | 0.41 vs. 41.7  | 0.1357  | 0.41 vs. 41.7  | <0.0001 |
|     | 0.41 vs. 84.6  | 0.1357  | 0.41 vs. 84.6  | <0.0001 |
|     | 0.78 vs. 0.98  | >0.9999 | 0.78 vs. 0.98  | 0.9176  |
|     | 0.78 vs. 2.4   | >0.9999 | 0.78 vs. 2.4   | 0.1357  |
|     | 0.78 vs. 5.3   | >0.9999 | 0.78 vs. 5.3   | 0.1357  |
|     | 0.78 vs. 10.4  | >0.9999 | 0.78 vs. 10.4  | 0.1357  |
|     | 0.78 vs. 19.5  | >0.9999 | 0.78 vs. 19.5  | 0.1357  |
|     | 0.78 vs. 41.7  | 0.1357  | 0.78 vs. 41.7  | <0.0001 |
|     | 0.78 vs. 84.6  | 0.1357  | 0.78 vs. 84.6  | <0.0001 |
|     | 0.98 vs. 2.4   | >0.9999 | 0.98 vs. 2.4   | 0.9176  |

|               |         |               |         |
|---------------|---------|---------------|---------|
| 0.98 vs. 5.3  | >0.9999 | 0.98 vs. 5.3  | 0.9176  |
| 0.98 vs. 10.4 | >0.9999 | 0.98 vs. 10.4 | 0.9176  |
| 0.98 vs. 19.5 | >0.9999 | 0.98 vs. 19.5 | 0.9176  |
| 0.98 vs. 41.7 | 0.1357  | 0.98 vs. 41.7 | 0.0026  |
| 0.98 vs. 84.6 | 0.1357  | 0.98 vs. 84.6 | <0.0001 |
| 2.4 vs. 5.3   | >0.9999 | 2.4 vs. 5.3   | >0.9999 |
| 2.4 vs. 10.4  | >0.9999 | 2.4 vs. 10.4  | >0.9999 |
| 2.4 vs. 19.5  | >0.9999 | 2.4 vs. 19.5  | >0.9999 |
| 2.4 vs. 41.7  | 0.1357  | 2.4 vs. 41.7  | 0.1357  |
| 2.4 vs. 84.6  | 0.1357  | 2.4 vs. 84.6  | 0.0026  |
| 5.3 vs. 10.4  | >0.9999 | 5.3 vs. 10.4  | >0.9999 |
| 5.3 vs. 19.5  | >0.9999 | 5.3 vs. 19.5  | >0.9999 |
| 5.3 vs. 41.7  | 0.1357  | 5.3 vs. 41.7  | 0.1357  |
| 5.3 vs. 84.6  | 0.1357  | 5.3 vs. 84.6  | 0.0026  |
| 10.4 vs. 19.5 | >0.9999 | 10.4 vs. 19.5 | >0.9999 |
| 10.4 vs. 41.7 | 0.1357  | 10.4 vs. 41.7 | 0.1357  |
| 10.4 vs. 84.6 | 0.1357  | 10.4 vs. 84.6 | 0.0026  |
| 19.5 vs. 41.7 | 0.1357  | 19.5 vs. 41.7 | 0.1357  |
| 19.5 vs. 84.6 | 0.1357  | 19.5 vs. 84.6 | 0.0026  |
| 41.7 vs. 84.6 | >0.9999 | 41.7 vs. 84.6 | 0.9176  |

**Table S4.** LC50 and 95% confidence intervals (IC) calculated after 24 h and 48 h of naphthalene (NAP), phenanthrene (PHE), fluoranthene (FLT) and benzo(k)fluoranthene (BkF) exposure on both nauplii and adults. The data were expressed in mg/L. n.a.= not available

|            | Nauplii |            |      |            | Adults |             |       |             |
|------------|---------|------------|------|------------|--------|-------------|-------|-------------|
|            | 24 h    |            | 48 h |            | 24 h   |             | 48 h  |             |
|            | LC50    | IC         | LC50 | IC         | LC50   | IC          | LC50  | IC          |
| <b>NAP</b> | 1.73    | 1.52-46.28 | 0.40 | 0.21-90.38 | 0.11   | 0.02-12.06  | 44.31 | 5.81-268.12 |
| <b>PHE</b> | 4.44    | 3.66-56.76 | 3.07 | 1.32-81.01 | n.a.   | n.a.        | 1.68  | 1.35-234.09 |
| <b>FLT</b> | 1.30    | 0.45-107.5 | 0.09 | 0.01-99.1  | 32.03  | 0.10-120.08 | 0.77  | 0.10-103.67 |
| <b>BkF</b> | n.a.    | n.a.       | n.a. | n.a.       | 28.67  | 0.5-36.67   | 6.12  | 0.05-48.72  |

**Table S5.** Data of expression levels in adults exposed to NAP, PHE, FLT and BkF, were reported as a fold difference (in red up-expressed genes; in green down-expressed genes) from control (represented by adults of crustaceans reared in SW without contaminants) for 48 h. Fold differences greater than  $\pm 1.5$  were considered significant.

|               |               | Naphthalene | Phenanthrene | Fluoranthene | Benzo-k-fluoranthene |
|---------------|---------------|-------------|--------------|--------------|----------------------|
| <b>Stress</b> | <i>hsp26</i>  | -2.16       | 5.20         | 1.96         | 2.56                 |
|               | <i>hsp60</i>  | 3.02        | 4.03         | 3.48         | 4.09                 |
|               | <i>hsp70</i>  | 0.31        | 3.35         | -1.51        | -1.37                |
|               | <i>COXI</i>   | 6.92        | 8.87         | 0.17         | -1.77                |
|               | <i>COXIII</i> | 7.77        | 12.65        | 0.79         | 1.65                 |

**Table S6.** Data of expression levels in adults exposed to NAP, PHE, FLT and BkF, were reported as a fold difference (in red up-expressed genes; in green down-expressed genes) from control (represented by adults of crustaceans reared in SW without contaminants) for 48 h. Fold differences greater than  $\pm 1.5$  were considered significant.

|                                    |                 | NAP     | PHE     | FLT   | BkF  |
|------------------------------------|-----------------|---------|---------|-------|------|
| <i>Stress</i>                      | <i>hsp26</i>    | -1.81   | 2.70    | 0.95  | 1.23 |
|                                    | <i>hsp60</i>    | 0.42    | 3.32    | 4.92  | 6.52 |
|                                    | <i>hsp70</i>    | 0.67    | 0.40    | 0.69  | 1.93 |
|                                    | <i>COXI</i>     | -0.82   | -3.92   | 0.90  | 2.61 |
|                                    | <i>COXIII</i>   | -0.83   | -3.59   | -0.59 | 2.03 |
| <i>Development/differentiation</i> | <i>HAD-like</i> | -4.4845 | 6.8765  | 3.05  | 7.02 |
|                                    | <i>tcp</i>      | 2.7405  | 7.4955  | -2.53 | 2.85 |
|                                    | <i>UCP2</i>     | 6.8885  | 12.3165 | 2.04  | 2.16 |
|                                    | <i>CDC48</i>    | 3.582   | 8.558   | -7.26 | 3.94 |

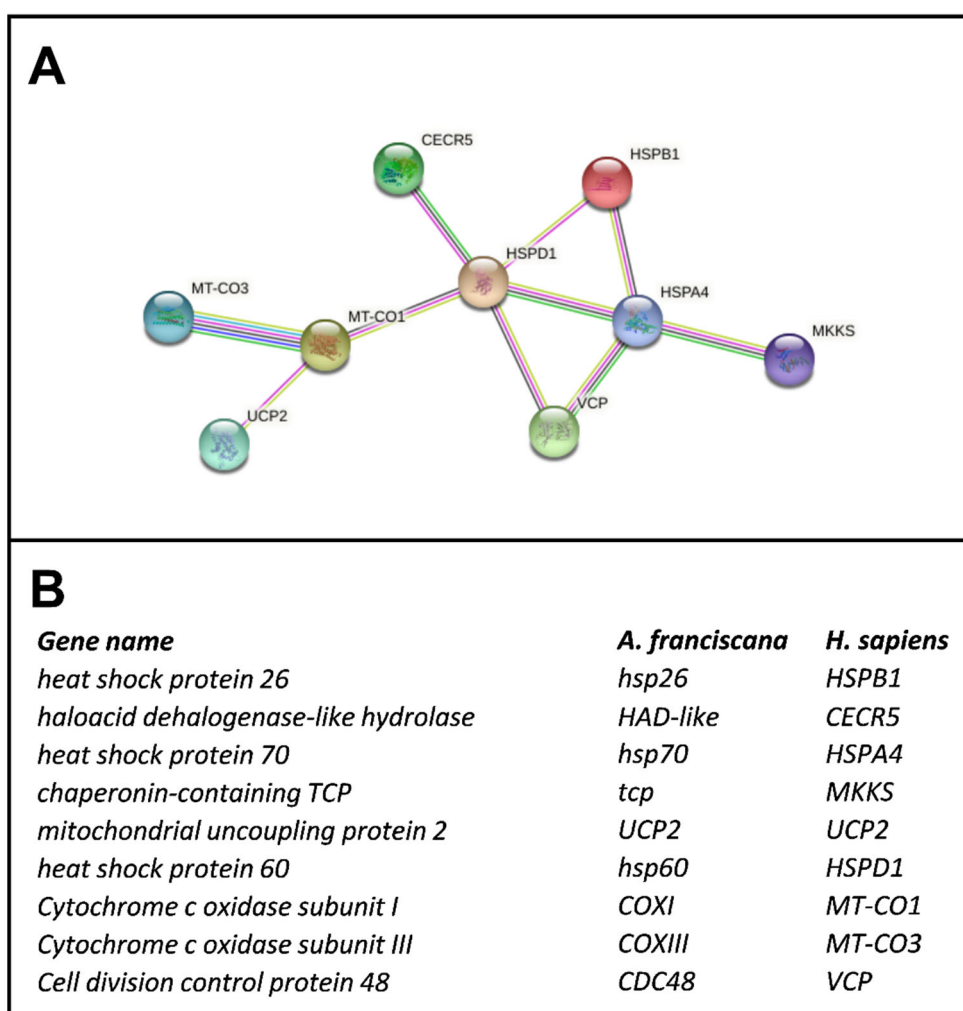

**Figure S1.** (A) Interactomic analysis by STRING (<https://string-db.org/>). The network graphically displays the relationship between genes. The biological relationships between genes are indicated by different colours. Known interactions: reported by database = light blue and determined experimentally = pink. Expected interactions: gene proximity = green; gene fusion = red; genes with similar pattern = light blue. (B) Human gene names and the corresponding *A. franciscana* orthologous genes.

---

## References

1. Eganhouse, R.P.; Calder, J.A. The solubility of medium molecular weight aromatic hydrocarbons and the effects of hydrocarbon co-solutes and salinity. *Geochim. Cosmochim. Acta* 1976, 40, 555–561.
2. May, W.E.; Wasik, S.P.; Freeman, D.H. Determination of the solubility behavior of some polycyclic aromatic hydrocarbons in water. *Preprints* 1978, 23, 877–884.
3. NOAA Cameo Chemicals (<https://cameochemicals.noaa.gov/>).
